# Urologia Internationalis

CONDIDIT: PETER A. NARATH (1955–1962)

EDITOR PRINCIPALIS: HEINRICH HEUSSER, Basel

SECRETARIUS GENERALIS: GEORGES MAYOR, Zürich

## EDITORES

C. E. ALKEN, Homburg, Saar  
P. BISCHOFF, Hamburg  
H. BOEMINGHAUS, Düsseldorf  
E. BORS, Long Beach, Calif.  
K. BOSHAMER, Wuppertal  
P. BRUNI, Napoli  
P. DEUTICKE, Wien  
J. D. FERGUSSON, London  
G. GIERTZ, Stockholm  
S. GIL VERNET, Barcelona  
W. E. GOODWIN, Los Angeles, Calif.  
W. GRÉGOIR, Bruxelles  
H. G. HANLEY, London  
F. HINMAN, Jr., San Francisco, Calif.  
A. R. KÜSS, Paris  
T. KUSUNOKI, Osaka

J. LANGE, Bordeaux  
W. F. LEADBETTER, Boston, Mass.  
E. LJUNGGREN, Göteborg  
F. MAY, München  
E. PÉREZ-CASTRO, Madrid  
A. PUIGVERT, Barcelona  
L. N. PYRAH, Leeds  
G. RAVASANI, Padova  
D. R. SMITH, San Francisco, Calif.  
H. TAKAYASU, Niigata  
R. UEBELHÖR, Wien  
A. VILLANUEVA, Mexico City  
W. F. WHITMORE, New York, N. Y.  
E. WILDBOLZ, Bern  
D. I. WILLIAMS, London

## REDACTORES

R. ANDERSEN, Oslo  
A. BABICS, Budapest  
J. BISQUERTT, T., Santiago  
TH. BURGHELE, Bucharest  
M. CAINE, Jerusalem  
A. CARNEIRO DE MOURA, Lisbon  
J. C. CHRISTOFFERSEN, Copenhagen  
L. CIFUENTES-DELATTE, Madrid  
P. J. DENNEHY, Johannesburg  
A. R. EL-SADR, Alexandria  
R. DE FREITAS, São Paulo  
H. U. GLOOR, Zürich  
I. H. GRIFFITHS, London  
H. HOUTAPPEL, Amsterdam  
F. A. HUGES, Montevideo  
L. LOPEZ, Caracas

S. A. MAC DONALD, Montreal  
H. MARBERGER, Innsbruck  
R. I. MATHIS, Buenos Aires  
E. MICHALOWSKI, Krakow  
J. MOMBAERTS, Bruxelles  
H. MORTENSEN, Melbourne  
A. OBERHOLTZER, Rome  
O. OBRANT, Göteborg  
V. PAČES, Prague  
S. PETROVIĆ, Belgrade  
A. PYTEL, Moscow  
L. QUÉNU, Paris  
F. TSUCHIYA, Tokyo  
P. I. TUOVINEN, Helsinki  
R. D. TURNER, Los Angeles, Calif.  
J. J. ALVAREZ IERENA, Mexico

## COLLABORATOIRES

vide pagina II

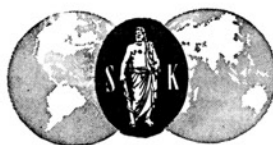

1964

Vol. 17

BASEL (Switzerland)

S. KARGER

NEW YORK

## COLLABORADORES

- V. AALKJAER, Aarhus  
S. ADANJA, Belgrade  
P. ALCALA-SANTARELLA,  
Valencia  
M. ALI, Karachi  
N. ALWALL, Lund  
J. C. ANDERSON, Sheffield  
O. ARIAS, Mexico City  
R. AUUVIGNE, Nantes  
W. BAKER, Chicago, Ill.  
N. J. BAKKER, 's-Gravenhage  
F. BALOGH, Budapest  
D. BAND, Edinburgh  
F. BAQUERO-GONZALEZ,  
Caracas  
Z. BARTKOWIAK, Poznań  
E. BLEGEN, Oslo  
G. BIEDERMANN, Innsbruck  
R. BLANGEY, Zürich  
A. BORJAS, Caracas  
J. P. BOURQUE, Montréal  
L. M. BREA, Buenos Aires  
E. BURNS, New Orleans, La.  
R. CACCHI, Ferrara  
G. CARROL, St. Louis, Mo.  
E. CASTRO, Mexico City  
J. M. CERVONI, Caracas  
C. CHIAUDANO, Torino  
A. CHRISTENSEN,  
København  
V. LE CLERC DANDROY,  
Bruxelles  
O. CORREA FUENZALIDA,  
Santiago  
E. da COSTA MANSO,  
São Paulo  
C. D. CREVEY, Minneapolis  
Minn.  
J. A. CURRIE, Capetown  
R. DARGET, Bordeaux  
R. DEFOORT, Anvers  
J. P. DEL POBIL, Sevilla  
T. DE LA MAZA SAAVEDRA,  
Madrid  
C. L. DEMING, New Haven,  
Conn.  
M. DEROT, Paris  
P. DONKER, Rotterdam  
H. DONOVAN, Birmingham  
J. L. EMMETT, Rochester,  
Minn.  
R. L. ENGELKING, Mexico City  
B. S. ERDURAN, Istanbul  
A. G. VAN ESSEN, Groningen  
P. FABRE, Toulouse  
B. FEY, Paris
- R. H. FLOCKS, Iowa City, Iowa  
H. FONTOURA MADUREIRA,  
Lisboa  
O. FRANCHE, Yassy  
F. FRANZAS, Kotka  
W. W. GALBRAITH, Glasgow  
A. E. GARCIA, Buenos Aires  
F. GARCIA RUIZ, Mexico City  
P. GAUSA, Barcelona  
TH. E. GIBSON, San Francisco  
F. de GIRONCOLI, Firenze  
J. HAMBURGER, Paris  
A. HARADA, Yokohama  
J. H. HARRISON, Boston, Mass.  
O. HENNIG, Augsburg  
H. HENNINGER, Wien  
A. B. HEPLER, Seattle, Wash.  
R. HERBST, Graz  
K. HEUSCH, Aachen  
A. HIDALGO, Madrid  
C. C. HIGGINS, Cleveland, Ohio  
K. HOEG, Oslo  
R. S. HOTCHKISS, New York,  
N.Y.  
F. HUEDEPOHL, Berlin  
T. ICHIKAWA, Tokyo  
T. INADA, Kyoto  
A. INGELMAN-SUNDBERG,  
Stockholm  
Z. KAIRIS, Athen  
J. KELLER, Dresden  
W. K. KERR, Toronto  
K. KIRKLAND, Sydney  
M. KLIKA, Praha  
T. G. KNUDTZON, København  
G. KORKUD, Istanbul  
O. KRIVEC, Zagreb  
T. J. D. LANE, Dublin  
J. P. LEGAULT, Montréal  
G. LINI, Budapest  
C. LOBO ONELL, Santiago  
J. LOMELIN, Mexico City  
W. MATHISEN, Oslo  
S. McMAHON, Durban  
A. Q. MENDIZABAL, Mexico  
City  
M. A. MIARI, Havana  
F. von MIKULICZ-RADECKI,  
Berlin  
J. MOLNAR, Budapest  
W. A. MOONEN, Vught  
T. D. MOORE, Memphis, Tenn.  
V. NEAGU, Bucharest  
M. NEGRO, Torino  
R. M. NESBIT, Ann Arbor, Mich.  
G. NICOLICH, Genova
- R. NISSEN, Basel  
K. OCHIAI, Tokyo  
V. J. O'CONOR, Chicago, Ill.  
M. OHKOSHI, Tokyo  
O. OLSSON, Lund  
I. ORSOLA-MARTI, Barcelona  
R. PEDROSO, Havana  
CH. PERRIER, Genève  
M. E. PESQUEIRA, Mexico City  
J. PICATOSTE Y PICATOSTE,  
Santander  
L. PISANI, Milano  
D. POOLE-WILSON, Manchester  
G. C. PRATHER, Boston, Mass.  
S. RAKOVEC, Ljubljana  
L. REBAUDI, Buenos Aires  
F. RËNYI-VAMOS, Budapest  
J. M. RETIEF, Capetown  
F. REUBI, Bern  
C. J. ROBSON, Toronto, Ontario  
R. ROCHA BRITO, São Paulo  
L. H. RODRIGUEZ-DIAZ,  
Caracas  
L. RODRIGUEZ-SANTANA,  
Caracas  
C. RUSCHE, Los Angeles, Calif.  
A. SADI, São Paulo  
R. E. SANDRO, Buenos Aires  
L. SANJURJO, Santurce,  
Puerto Rico  
H. J. SARRE, Freiburg i. Br.  
M. SECRÉTAN, Lausanne  
F. SERRALLACH JULIA,  
Barcelona  
S. SHIGEMATSU, Kurume  
K. SHIMIZU, Nagoya  
H. M. SPENCE, Dallas, Texas  
R. STEINERT, Oslo  
C. B. STEWART, Winnipeg,  
Manitoba  
M. STOLZE, Halle  
C. J. SVENDSEN, Oslo  
H. TAMURA, Tokyo  
T. ST. TANEFF, Sofia  
E. THIERNANN, Nürnberg  
J. THOMA, Luxembourg  
L. F. TORRES, Manila  
A. TRABUCCO, Buenos Aires  
K. TRAUTNER, København  
I. TSUJI, Sapporo  
J. H. J. VAN DER VUURST  
DE VRIES, Utrecht  
ST. WESOLOWSKI, Warszawa  
M. ZAMITH, Coimbra  
R. ZENKER, München

## TRANSLADORES

### Deutsch

- English: S. M. RABSON, Los Angeles, Calif.  
-Español: Dr. P. DE LÉON, Barcelona  
-Français: E. AMSLER, Lausanne

### English

- Deutsch: H. G. STOLL, Bremen  
-Español: Dr. R. GOSÁLBIZ, Barcelona  
-Français: W. GRÉGOIR, Bruxelles

### Français

- Deutsch: R. DEWES, Hamm, Westf.  
-English: S. M. RABSON, Los Angeles, Calif.  
-Español: L. CIFUENTES-DELTATE, Madrid

# Index

|                                                                                                                                                               |     |
|---------------------------------------------------------------------------------------------------------------------------------------------------------------|-----|
| ALLEGRI, G.: vide PERISSINOTTO, B.                                                                                                                            |     |
| ASECHI, S.: vide OKAMOTO, K.                                                                                                                                  |     |
| BENASSI, C. A.: vide PERISSINOTTO, B.                                                                                                                         |     |
| BENGMARK, S. AND HESSELSJÖ, R.:<br>Endocrine Dependence of Rat Seminal Vesicle Tissue in Tissue Culture                                                       | 84  |
| BERARIU, T.: vide BRUDA, P.                                                                                                                                   |     |
| BISCHOFF, P. F. UND GIESELMANN, H.:<br>Ergebnisse der konservativ-chirurgischen Behandlung der malignen<br>Blasengeschwülste . . . . .                        | 193 |
| BOYCE, W. H.: vide KEUTEL, H. J.                                                                                                                              |     |
| BRUDA, P.; BERARIU, T. UND GOŞEA, C.:<br>Die biochemischen Faktoren in der Ätiologie der Urolithiasis. . . . .                                                | 230 |
| DE FREITAS, R.: vide SADI, A.                                                                                                                                 |     |
| DUBACH, U. C. UND REDIGER, RÖSLI:<br>Die Lactatdehydrogenase-Aktivität im Urin bei urologischen und medi-<br>zinischen Krankheiten . . . . .                  | 65  |
| FORMANEK, K.; GASSER, G.; KOVAC, W. UND PREISINGER, A.:<br>Eine neue Methode zur Erzeugung von Blasensteinen bei Ratten . . . . .                             | 34  |
| FRITJOFSSON, Å.; HELANDER, C.-G.; LINDELL, S.-E. AND OBRANT, K. O.:<br>Renal Function in Urogenital Tuberculosis Before and After Chemo-<br>therapy . . . . . | 93  |
| Roentgenological Findings and Clearance Functions in Cases of Renal<br>Tuberculosis . . . . .                                                                 | 106 |
| GASSER, G. UND HOLZNER, J. H.:<br>Bilaterale Aplasie des Ductus deferens . . . . .                                                                            | 164 |
| GASSER, G.: vide FORMANEK, K.                                                                                                                                 |     |
| GIESELMANN, H.: vide BISCHOFF, P. F.                                                                                                                          |     |
| GOŞEA, C.: vide BRUDA, P.                                                                                                                                     |     |
| HELANDER, C.-G.: vide FRITJOFSSON, Å.                                                                                                                         |     |
| HESSELSJÖ, R.: vide BENGMARK, S.                                                                                                                              |     |
| HOHENFELLNER, R. UND ZEITLHOFFER, J.:<br>Plastische Erweiterung der Harnblase mittels Serosa und Teflon . . . . .                                             | 14  |
| HOLZNER, J. H.: vide GASSER, G.                                                                                                                               |     |
| KEUTEL, H. J.; KING, J. S., JR. AND BOYCE, W.:<br>Further Studies of Uromucoid in Normal and Stone Urine . . . . .                                            | 324 |
| KING, J. S., JR.: vide KEUTEL, H. J.                                                                                                                          |     |
| KINOSHITA, K.: vide OHKAWA, T.                                                                                                                                |     |
| KISCHEFF, S.:<br>Die dritte Variante unserer Urethroplastik bei Strikturen . . . . .                                                                          | 115 |
| KISHEV, S.:<br>Our Operative Technique for Repairing an Avulsed Prostate or a Sub-<br>sequent Obliteration of the Posterior Urethra . . . . .                 | 364 |
| KOTAKE, T.: vide OHKAWA, T.                                                                                                                                   |     |
| KOVAC, W.: vide FORMANEK, K.                                                                                                                                  |     |
| KRIVEC, O.: vide TOMIĆ-KAROVIĆ, K.                                                                                                                            |     |
| KUSUNOKI, T.: vide OHKAWA, T.                                                                                                                                 |     |
| LASKA, A.: vide WOJEWSKI, A.                                                                                                                                  |     |
| LINDELL, S.-E.: vide FRITJOFSSON, Å.                                                                                                                          |     |
| MARQUES FIGUEIREDO FILHO, A.: vide SADI, A.                                                                                                                   |     |
| MATOUSCHEK, E.:<br>Die Enzym-Muster der Adenome periurethraler Drüsen . . . . .                                                                               | 154 |
| METZNER, BARBARA SUZANNE: vide SADI, A.                                                                                                                       |     |
| MICHALANY, J.: vide SADI, A.                                                                                                                                  |     |
| MIYAGAWA, M.: vide OHKAWA, T.                                                                                                                                 |     |

|                                                                                                                                                                                                                               |                    |
|-------------------------------------------------------------------------------------------------------------------------------------------------------------------------------------------------------------------------------|--------------------|
| NAGATA, K.: vide OKAMOTO, K.                                                                                                                                                                                                  |                    |
| NARATH, P. A.: Calyx Minimus . . . . .                                                                                                                                                                                        | 257                |
| NYLANDER, G. AND TERNER, N.:<br>A New Pituitary-Inhibiting Compound in the Treatment of Prostatic<br>Cancer . . . . .                                                                                                         | 129                |
| OBRANT, K. O.: vide FRITJOFSSON, Å.                                                                                                                                                                                           |                    |
| OHKAWA, T.; SONODA, T.; YANO, H.; TAKEUCHI, M.; MIYAGAWA, M.; KINOSHITA, K.; KOTAKE,<br>T. AND KUSUNOKI, T.:<br>Histologic and Histochemical Studies on the Kidney in Experimentally<br>Induced Hyperparathyroidism . . . . . | 294                |
| OKAMOTO, K.; ASECHI, S. AND NAGATA, K.:<br>Distribution of Chyluria and its Treatment in Japan . . . . .                                                                                                                      | 241                |
| PERISSINOTTO, B.; BENASSI, C. A. AND ALLEGRI, G.:<br>Urinary Excretion of Tryptophan Metabolites in Patients with Renal<br>Pelvis and Parenchyma Tumours . . . . .                                                            | 175                |
| PHOKITIS, P.:<br>The Supernumerary Kidney . . . . .                                                                                                                                                                           | 265                |
| PIO DA SILVA, M.: vide SADI, A.                                                                                                                                                                                               |                    |
| PREISINGER, A.: vide FORMANEK, K.                                                                                                                                                                                             |                    |
| PYTEL, A. Y.:<br>Entero-Revascularization of the Kidney in the Treatment of Nephro-<br>genous Hypertension . . . . .                                                                                                          | 1                  |
| REDIGER, RÖSLI: vide DUBACH, U. C.                                                                                                                                                                                            |                    |
| SADI, A.:<br>Surgery of the Adrenals. . . . .                                                                                                                                                                                 | 51                 |
| SADI, A. AND METZNER, BARBARA SUZANNE:<br>Congenital Bilateral Absence of Testicles (Anorchidism) . . . . .                                                                                                                   | 342                |
| SADI, A.; DE FREITAS, R.; MARQUES FIGUEIREDO FILHO, A.; PIO DA SILVA, M. AND SAWAYA, M.:<br>Considerations Regarding the Etiopathology of Prostatic Cancer . . . . .                                                          | 349                |
| SADI, A.; MICHALANY, J. AND METZNER, BARBARA SUZANNE:<br>Experimental Cryptorchidism in Rats. Reaction of the Testicular Tissue to<br>Injection with Irritating Substances . . . . .                                          | 146                |
| SAWAYA, M.: vide SADI, A.                                                                                                                                                                                                     |                    |
| SILLÓ, G.:<br>Catheter for Analysis of Sperm, Seminal Vesicle and Prostatic Secretion . . . . .                                                                                                                               | 321                |
| SONODA, T.: vide OHKAWA, T.                                                                                                                                                                                                   |                    |
| TAKEUCHI, M.: vide OHKAWA, T.                                                                                                                                                                                                 |                    |
| TERNER, N.: vide NYLANDER, G.                                                                                                                                                                                                 |                    |
| TOMIĆ-KAROVIĆ, K. UND KRIVEC, O.:<br>Lactobacillus acidophilus in der Behandlung urologischer Infektionen . . . . .                                                                                                           | 183                |
| WOJEWKSI, A. AND LASKA, A.:<br>Experimental Cancer of the Prostate . . . . .                                                                                                                                                  | 223                |
| YANO, H.: vide OHKAWA, T.                                                                                                                                                                                                     |                    |
| ZEITLHOFFER, J.: vide HOHENFELLNER, R.                                                                                                                                                                                        |                    |
| BOOK-REVIEWS – BUCHBESPRECHUNGEN – LIVRES NOUVEAUX . . . . .                                                                                                                                                                  | 390                |
| CONGRESSES – KONGRESSE – CONGRES . . . . .                                                                                                                                                                                    | 389, 320, 256, 192 |
| INDEX RERUM Ad. Vol. 17 / No. 6 . . . . .                                                                                                                                                                                     | 391                |
| PROCEEDINGS – VERHANDLUNGEN – COMPTES RENDUS . . . . .                                                                                                                                                                        | 318                |

Alle Rechte, insbesondere das der Übersetzung in fremde Sprachen, vorbehalten  
Ohne ausdrückliche Genehmigung des Verlages ist es auch nicht gestattet, dieses Buch oder Teile  
daraus auf photomechanischem Wege (Photokopie, Mikrokopie) zu vervielfältigen

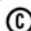

Copyright 1964 by S. Karger AG., Basel  
Printed in Switzerland by Buchdruckerei Aargauer Tagblatt AG., Aarau  
Clichés: Steiner & Cie. AG., Basel
